# Supplementary material
Source: publisher figshare collection journal article supplement (https://acs.figshare.com/ndownloader/files/5058673)
Supplement: Supplementary file 1 [file 5058673]

- **Supporting Information**

- 

## 1. TGA-DSC analysis of surfactants

Figures 1(a) to 1(c) display the TGA-DSC data of various surfactants analyzed in this study. Triton X-100 began to lose weight at about 300°C and decomposed at about 390°C as evidenced by an exothermal peak (Figure 1(a)). Another exothermal peak occurred at about 650 °C was caused by carbon burning. Brij-30 displayed similar thermal properties except a slightly lower decomposition temperature at about 350°C (Figure 1(b)). Figure 1(c) shows the TGA-DSC analysis of AOT where approximately 15 wt% of residue remained even after complete surfactant decomposition.

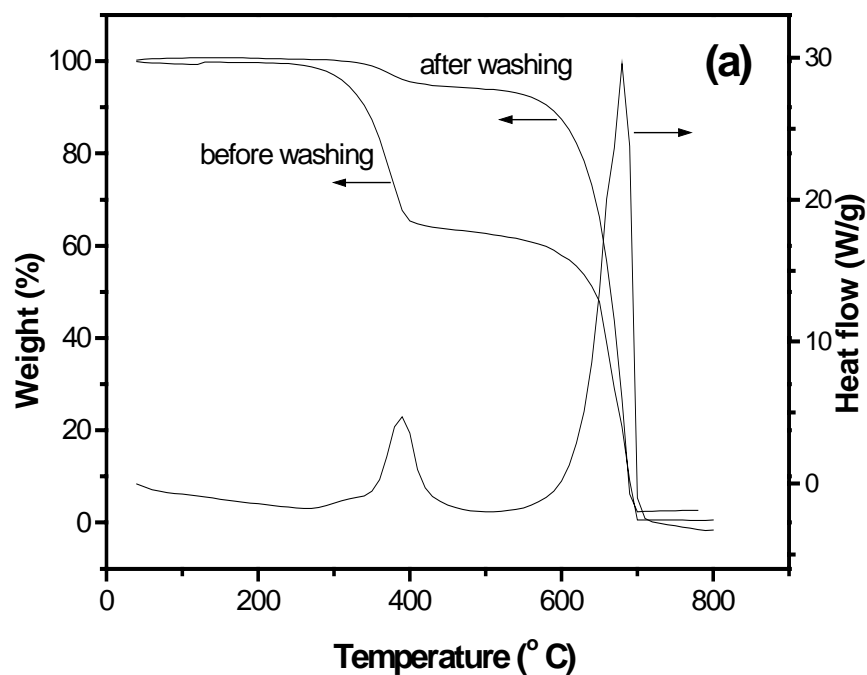

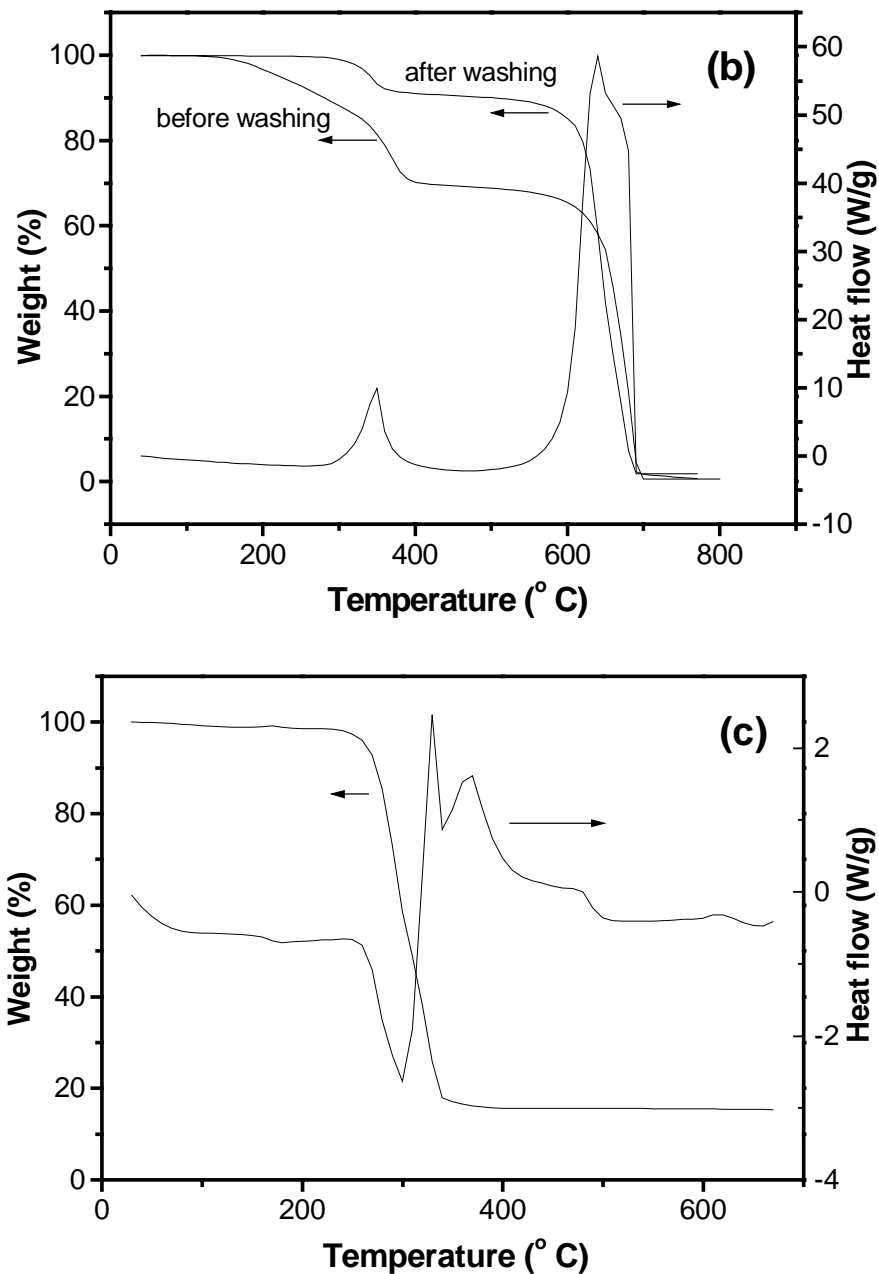

Figure 1. TGA-DSC curves of surfactants: (a) Triton X-100/C before and after washing; (b) Brij-30/C before and after washing; and (c) AOT. All the experiments were carried out in air with a heating rate of 20°C/min.

## 2. EDX Analysis of tungsten oxide and metallic tungsten

The EDX spectrums of tungsten oxide and metallic tungsten are shown in Figures 2 (a) and 2(b), respectively. No inorganic impurities were detected.

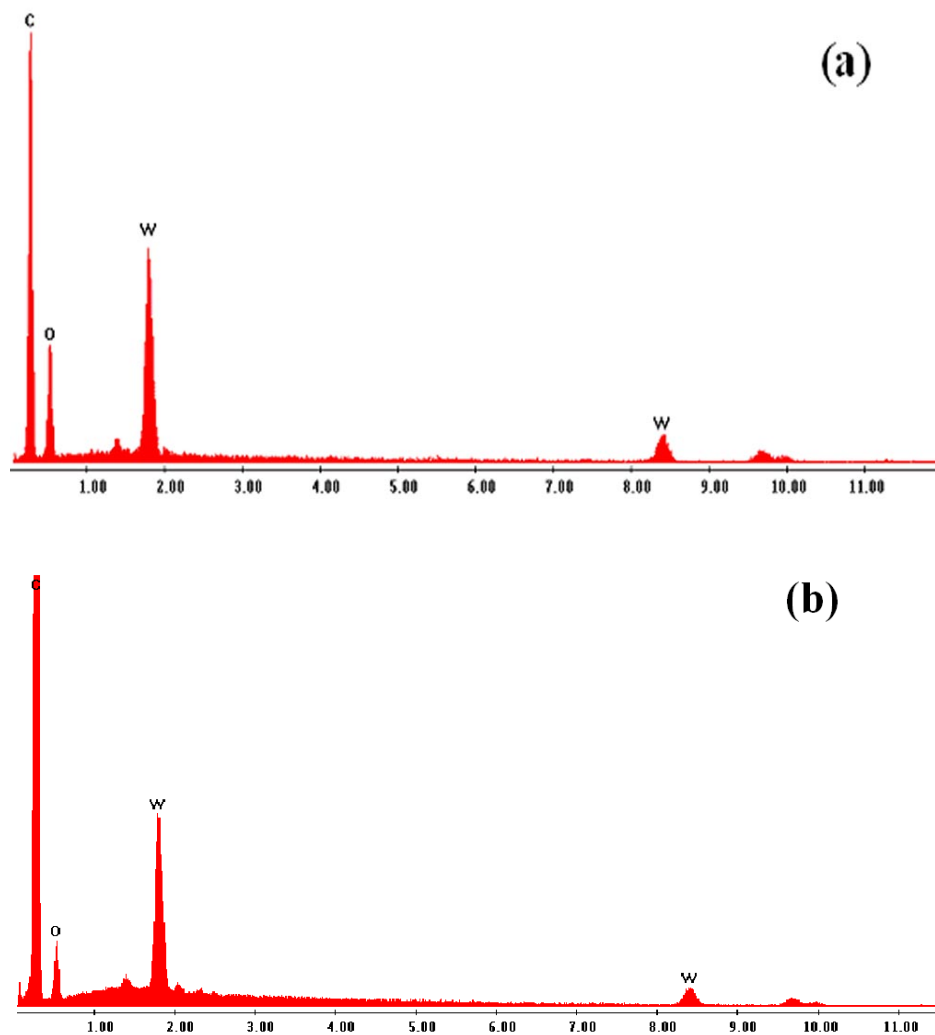

Figure 2. EDX spectrums of (a) tungsten oxide and (b) metallic tungsten. Samples were prepared on carbon tapes.

### 3. Low magnification TEM micrographs

The HAADF-STEM images of unsupported metallic tungsten and tungsten oxide nanoparticles at low magnification are shown in Figures 3(a) and 3(b), respectively. The bright spots due to Z-contrast are tungsten (Figure 3(a)) or tungsten oxide (Figure 3(b)).

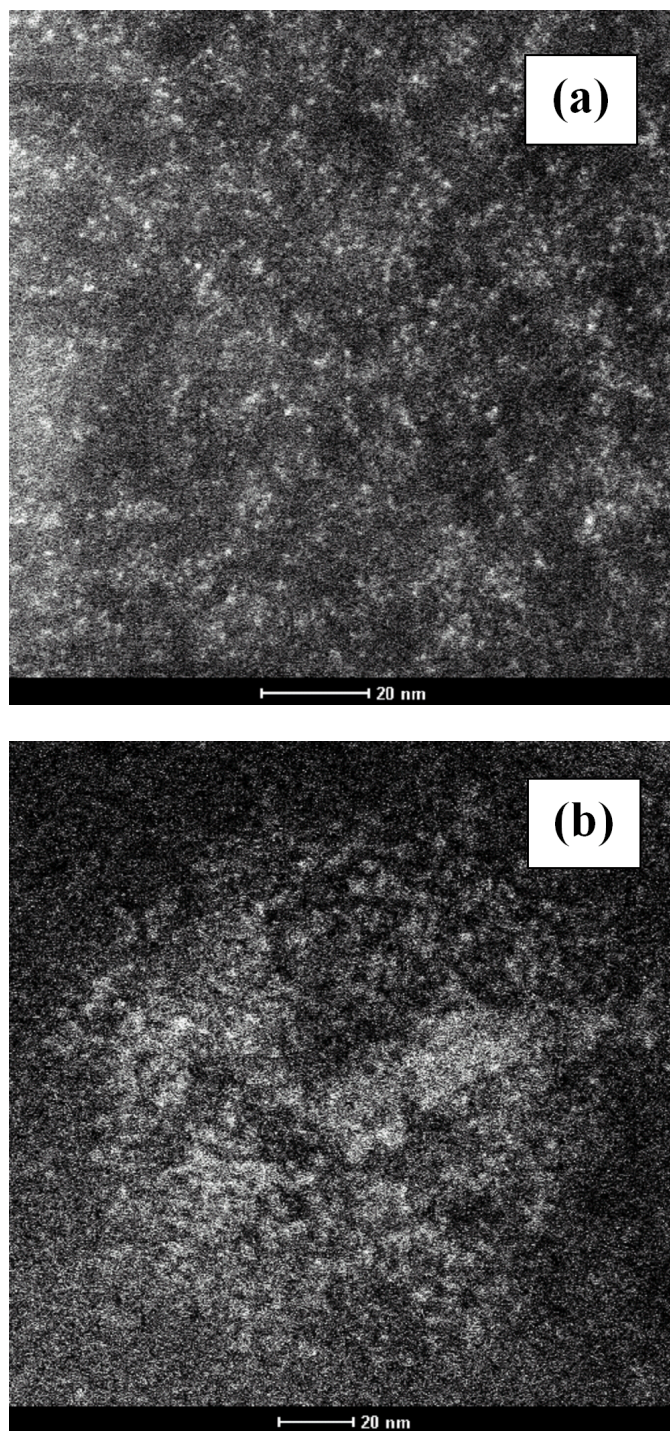

Figure 3 HAADF-STEM micrographs of (a) unsupported tungsten and (b) tungsten oxide.
